# Supplementary material
Source: PubMed Central journal article supplement (PMC5207142)
Supplement: 10.1074_M116.746339_jbc.M116.746339-1.pdf [file 10.1074_M116.746339_jbc.M116.746339-1.pdf]

## Supplementary Figures

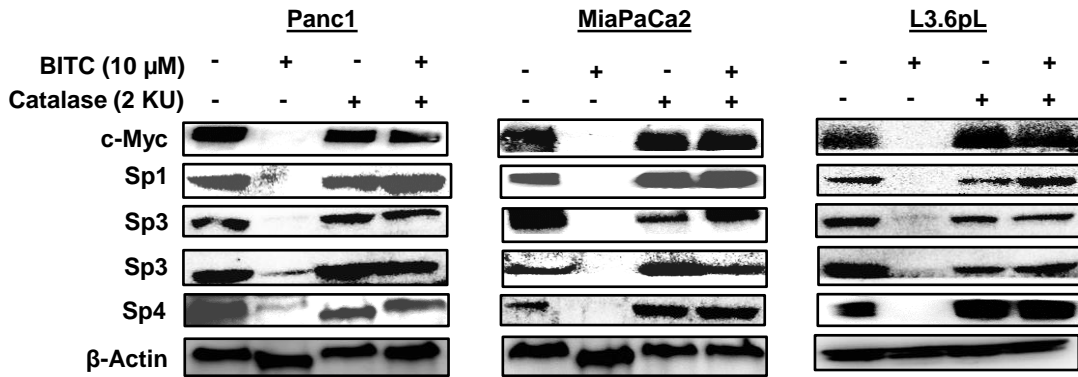

**Supplementary Figure S1.** Effects of catalase. Cells were treated with BITC alone or in combination with catalase for 24 hr, and protein expression in whole cell lysates was determined by western blots.

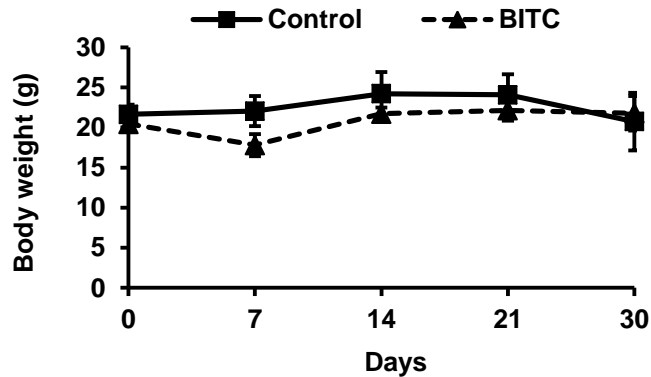

**Supplementary Figure S2.** *In vivo* studies. Changes in body weights of athymic nude mice administered the solvent control or BITC (20 mg/kg/d).
